# Supplementary material for: Effectiveness of a web-based behavioural activation intervention for individuals with depression based on the Health Action Process Approach: protocol for a randomised controlled trial with a 6-month follow-up
Source: HighWire-hosted journal article supplement (doi:10.1136/bmjopen-2021-054775), 2022-01-01
Supplement: bmjopen-2021-054775supp001_data_supplement.pdf [file bmjopen-2021-054775supp001_data_supplement.pdf]

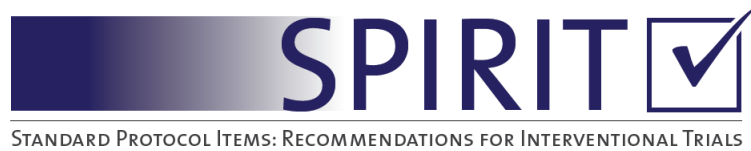

SPIRIT 2013 Checklist: Recommended items to address in a clinical trial protocol and related documents\*

| Section/item                      | Item No | Description/Page                                                                                                                                                                                                                                                                                                                                                                        |
|-----------------------------------|---------|-----------------------------------------------------------------------------------------------------------------------------------------------------------------------------------------------------------------------------------------------------------------------------------------------------------------------------------------------------------------------------------------|
| <b>Administrative information</b> |         |                                                                                                                                                                                                                                                                                                                                                                                         |
| Title                             | 1       | Page 1                                                                                                                                                                                                                                                                                                                                                                                  |
| Trial registration                | 2a      | Page 2                                                                                                                                                                                                                                                                                                                                                                                  |
|                                   | 2b      | See table below                                                                                                                                                                                                                                                                                                                                                                         |
| Protocol version                  | 3       | Page 22                                                                                                                                                                                                                                                                                                                                                                                 |
| Funding                           | 4       | Page 23                                                                                                                                                                                                                                                                                                                                                                                 |
| Roles and responsibilities        | 5a      | Page 1 & Page 23                                                                                                                                                                                                                                                                                                                                                                        |
|                                   | 5b      | University of Freiburg<br>Department of Rehabilitation Psychology and Psychotherapy<br>Institute of Psychology<br>Engelbergerstr. 41,<br>79085 Freiburg, Germany                                                                                                                                                                                                                        |
|                                   | 5c      | This trial is investigator-initiated. The sponsor (University of Freiburg) and funding source (German Research Foundation) had no role in the design of this study. Sponsor and funding source will have no role during trial execution, analyses, interpretation of the data, or decision to submit results.                                                                           |
|                                   | 5d      | LK is the principal investigator. CMW is responsible for recruitment and data acquisition. JB and TZ supervise the recruitment of participants. JB is responsible for all aspects of local organisation including identifying potential recruits and taking consent. CMW, JB and TZ meet weekly throughout the trial to oversee trial conduct and recruitment. JB supervises the trial. |
| <b>Introduction</b>               |         |                                                                                                                                                                                                                                                                                                                                                                                         |
| Background and rationale          | 6a      | Pages 4-7                                                                                                                                                                                                                                                                                                                                                                               |
|                                   | 6b      | Pages 4-7                                                                                                                                                                                                                                                                                                                                                                               |
| Objectives                        | 7       | Page 6-7                                                                                                                                                                                                                                                                                                                                                                                |

Trial design 8 Page 7

**Methods: Participants, interventions, and outcomes**

Study setting 9 Page 8

Eligibility criteria 10 Page 9

Interventions 11a Pages 10-12

11b Page 10

11c Pages 10-12

11d Pages 10-12

Outcomes 12 Pages 12-18

Participant  
timeline 13 Page 7

Sample size 14 Page 18

Recruitment 15 Page 8

**Methods: Assignment of interventions (for controlled trials)**

Allocation:

Sequence  
generation 16a Page 10

Allocation  
concealment  
mechanism 16b Allocation concealment is ensured as participants are not randomised until they have been included in the trial, which is after all baseline measurements have been completed.

Implementatio  
n 16c Page 10

Blinding  
(masking) 17a Page 10

17b In case of adverse events (e.g. acute suicidal ideation), unblinding of the telephone interviewer is permissible if necessary. All cases of unblinding will be documented.

**Methods: Data collection, management, and analysis**

Data collection  
methods 18a Pages 12-18

18b Page 8

|                     |     |                                                                                                                                                                                     |
|---------------------|-----|-------------------------------------------------------------------------------------------------------------------------------------------------------------------------------------|
| Data management     | 19  | All data will be handled and stored as described in our data protection plan and ethical approval. Within the data protection plan, records of processing activities are specified. |
| Statistical methods | 20a | Page 19                                                                                                                                                                             |
|                     | 20b | Page 19                                                                                                                                                                             |
|                     | 20c | Page 19                                                                                                                                                                             |

### **Methods: Monitoring**

|                 |     |                                                                                                                                                                                                                                                                                                                                                     |
|-----------------|-----|-----------------------------------------------------------------------------------------------------------------------------------------------------------------------------------------------------------------------------------------------------------------------------------------------------------------------------------------------------|
| Data monitoring | 21a | A Data Monitoring Committee (DMC) has been established. The DMC is independent of the study organisers and consists of Prof. Dr Brunna Tuschen-Caffier, Prof. Dr Erik Farin-Glattacker and Prof. Dr Dr Martin Härter. The DMC will advise the project team in case of adverse events and recommend if the trial should be modified or discontinued. |
|                 | 21b | Data collection will continue until the targeted sample of 128 participants is reached.                                                                                                                                                                                                                                                             |
| Harms           | 22  | Pages 9-10                                                                                                                                                                                                                                                                                                                                          |
| Auditing        | 23  | The recruitment management group (CMW, TZ, JB) meets weekly throughout the trial to oversee trial conduct and recruitment.                                                                                                                                                                                                                          |

### **Ethics and dissemination**

|                          |     |                                                                                                                                                                                                                                                                                                                                       |
|--------------------------|-----|---------------------------------------------------------------------------------------------------------------------------------------------------------------------------------------------------------------------------------------------------------------------------------------------------------------------------------------|
| Research ethics approval | 24  | Page 2 & Page 22                                                                                                                                                                                                                                                                                                                      |
| Protocol amendments      | 25  | Deviations from the study protocol will be fully documented and disclosed in further publications. In case of deviations, the protocol in the clinical trial registry will be updated.                                                                                                                                                |
| Consent or assent        | 26a | Positively screened individuals receive in-depth study and data privacy information via email. All participants submit their informed consent online before study inclusion. Participants can withdraw their participation in the study at any time and request the deletion of their data as long as the data is not yet anonymised. |
|                          | 26b | Participant data will not be used in ancillary studies. This trial does not involve the collection of biological specimens.                                                                                                                                                                                                           |
| Confidentiality          | 27  | All data will be handled and stored as described in our data protection plan and ethical approval. Rules of data security were developed with the approval of the data security officer of the University of Freiburg.                                                                                                                |
| Declaration of interests | 28  | Page 23                                                                                                                                                                                                                                                                                                                               |

|                               |     |                                                                                                                                                                             |
|-------------------------------|-----|-----------------------------------------------------------------------------------------------------------------------------------------------------------------------------|
| Access to data                | 29  | Only the project team in Freiburg has access to personal data. Anonymised data can be made available to other scientists based on cooperation agreements.                   |
| Ancillary and post-trial care | 30  | The trial centre provides no post-trial care. Generally, health care costs in Germany are covered by the health insurance companies without extra costs for the individual. |
| Dissemination policy          | 31a | Pages 19-20 & Page 22                                                                                                                                                       |
|                               | 31b | No professional writers will be hired.                                                                                                                                      |
|                               | 31c | The study protocol is published in an open-access format.                                                                                                                   |

### Appendices

|                            |    |                                                                                                                                   |
|----------------------------|----|-----------------------------------------------------------------------------------------------------------------------------------|
| Informed consent materials | 32 | All participant materials have been approved by the ethics committee and can be obtained in German from the corresponding author. |
| Biological specimens       | 33 | No biological specimens are collected.                                                                                            |

---

\*It is strongly recommended that this checklist be read in conjunction with the SPIRIT 2013 Explanation & Elaboration for important clarification on the items. Amendments to the protocol should be tracked and dated. The SPIRIT checklist is copyrighted by the SPIRIT Group under the Creative Commons "[Attribution-NonCommercial-NoDerivs 3.0 Unported](#)" license.

| WHO Trial Registration Data Set (Version 1.3.1) |                                               |                                                                                                                                                                                                                                                                                                |
|-------------------------------------------------|-----------------------------------------------|------------------------------------------------------------------------------------------------------------------------------------------------------------------------------------------------------------------------------------------------------------------------------------------------|
| 1                                               | Primary Registry and Trial Identifying Number | German Clinical Trials Register; Main ID: DRKS00024349                                                                                                                                                                                                                                         |
| 2                                               | Date of Registration in Primary Registry      | 29/01/2021                                                                                                                                                                                                                                                                                     |
| 3                                               | Secondary Identifying Numbers                 | N/A                                                                                                                                                                                                                                                                                            |
| 4                                               | Source(s) of Monetary or Material Support     | German Research Foundation                                                                                                                                                                                                                                                                     |
| 5                                               | Primary Sponsor                               | University of Freiburg<br>Department of Rehabilitation Psychology and Psychotherapy<br>Institute of Psychology<br>Engelbergerstr. 41,<br>79085 Freiburg, Germany                                                                                                                               |
| 6                                               | Secondary Sponsor(s)                          | N/A                                                                                                                                                                                                                                                                                            |
| 7                                               | Contact for Public Queries                    | Name: Claudia Mueller-Weinitschke<br>Address: Engelbergerstr. 41 79085 Freiburg Germany<br>Telephone: 07612039439<br>Email: interaktiv@psychologie.uni-freiburg.de<br>Affiliation: University of Freiburg, Department of Rehabilitation Psychology and Psychotherapy , Institute of Psychology |
| 8                                               | Contact for Scientific Queries                | Name: Lena Krämer<br>Address: Engelbergerstr. 41 79085 Freiburg Germany<br>Telephone: 07612039315<br>Email: kraemer@psychologie.uni-freiburg.de<br>Affiliation: University of Freiburg, Department of Rehabilitation Psychology and Psychotherapy , Institute of Psychology                    |
| 9                                               | Public Title                                  | Behavioral activation based on the Health Action Process Approach – Efficacy of a theory-based online intervention in depression                                                                                                                                                               |
| 10                                              | Scientific Title                              | Behavioral activation based on the Health Action Process Approach – Efficacy of a theory-based online intervention in depression - InterAKTIV                                                                                                                                                  |
| 11                                              | Countries of Recruitment                      | Germany                                                                                                                                                                                                                                                                                        |
| 12                                              | Health Condition(s) or Problem(s) Studied     | F32 - Depressive episode                                                                                                                                                                                                                                                                       |
| 13                                              | Intervention(s)                               | Intervention 1: Intervention group: Participants receive access to the web-based intervention, comprising 7 modules (45 minutes each, plus an introductory module), daily motivating SMS, weekly homework assignments, and weekly feedback from a psychologist.                                |

|    |                                      |                                                                                                                                                                                                                                                                                                                                                                                                                                                                                                                                                                                                                                                                                                                                                                                                                                                                                                                                                                   |
|----|--------------------------------------|-------------------------------------------------------------------------------------------------------------------------------------------------------------------------------------------------------------------------------------------------------------------------------------------------------------------------------------------------------------------------------------------------------------------------------------------------------------------------------------------------------------------------------------------------------------------------------------------------------------------------------------------------------------------------------------------------------------------------------------------------------------------------------------------------------------------------------------------------------------------------------------------------------------------------------------------------------------------|
|    |                                      | <p>Participants of the intervention group have unrestricted access to other health care services.</p> <p>Intervention 2: Control group: Participants of the control group receive access to the web-based intervention after follow-up assessments. Participants of the control group have unrestricted access to other health care services.</p>                                                                                                                                                                                                                                                                                                                                                                                                                                                                                                                                                                                                                 |
| 14 | Key Inclusion and Exclusion Criteria | <p>Inclusion criteria: Depression diagnosis in clinical interview</p> <p>Exclusion criteria: current psychotherapy, current change of psychopharmaceuticals, exclusion diagnosis</p> <p>Age minimum: 18 Years<br/>Age maximum: 65 Years<br/>Gender: Both, male and female</p>                                                                                                                                                                                                                                                                                                                                                                                                                                                                                                                                                                                                                                                                                     |
| 15 | Study Type                           | interventional                                                                                                                                                                                                                                                                                                                                                                                                                                                                                                                                                                                                                                                                                                                                                                                                                                                                                                                                                    |
| 16 | Date of First Enrollment             | 08/02/2021                                                                                                                                                                                                                                                                                                                                                                                                                                                                                                                                                                                                                                                                                                                                                                                                                                                                                                                                                        |
| 17 | Sample Size                          | 128                                                                                                                                                                                                                                                                                                                                                                                                                                                                                                                                                                                                                                                                                                                                                                                                                                                                                                                                                               |
| 18 | Recruitment Status                   | Pending                                                                                                                                                                                                                                                                                                                                                                                                                                                                                                                                                                                                                                                                                                                                                                                                                                                                                                                                                           |
| 19 | Primary Outcome(s)                   | <p>Primary outcome is the change of depression severity, measured by the QIDS (Quick Inventory of Depressive Symptomatology, externally assessed during the telephone interview), between baseline (t1) and post-intervention (t2, eight weeks after randomization). In addition, depression severity will be assessed at follow-up (t3, six months after randomization).</p>                                                                                                                                                                                                                                                                                                                                                                                                                                                                                                                                                                                     |
| 20 | Key Secondary Outcomes               | <ol style="list-style-type: none"> <li>1. Remission of depression (SCID-1, Structured clinical interview for DSM-V)</li> <li>2. Depression response (PHQ-9; Patient Health Questionnaire-9)</li> <li>3. Activity behavior: Everyday activity (BADS; Behavioral Activation for Depression Scale)</li> <li>4. Activity behavior: Physical activity (IPAQ-SF; International Physical Activity Questionnaire - Short Form)</li> <li>5. Motivational and volitional indicators (outcome expectancies, motivational self-efficacy, intention, volitional self-efficacy, action planning, coping planning, action control)</li> <li>6. Perseverative cognitive processes (RSQ-D; Response Style Questionnaire – German Version)</li> <li>7. Side effects of the intervention (INEP; Inventar zu Erfassung negativer Effekte von Psychotherapie)</li> </ol> <p>All assessments take place at baseline (t1), eight weeks (t2) and six months after randomization (t3).</p> |

|    |                       |                                                                                                                                                                                                                                                                                                                                                  |
|----|-----------------------|--------------------------------------------------------------------------------------------------------------------------------------------------------------------------------------------------------------------------------------------------------------------------------------------------------------------------------------------------|
|    |                       | <p>Covid-19-related limitations are recorded at all three time points (self-report).</p> <p>Additionally, sociodemographic information and the initial motivational level will be assessed at baseline (t1; self-report).</p> <p>At t2, received health care services (FIMA) as well as satisfaction with the intervention will be assessed.</p> |
| 21 | Ethics Review         | <p>Status: approved<br/>Approval date: 19/11/2020<br/>Contact:<br/>(leading) Ethics Committee-No. 20-1045 (Ethik-Kommission der Albert-Ludwigs-Universität Freiburg)</p>                                                                                                                                                                         |
| 22 | Completion date       | N/A                                                                                                                                                                                                                                                                                                                                              |
| 23 | Summary Results       | N/A                                                                                                                                                                                                                                                                                                                                              |
| 24 | IPD sharing statement | <p>It is planned to make the anonymised evaluation data set available to external scientists for research purposes on the basis of cooperation agreements.</p>                                                                                                                                                                                   |
