# Supplementary material for: Effectiveness of a web-based behavioural activation intervention for individuals with depression based on the Health Action Process Approach: protocol for a randomised controlled trial with a 6-month follow-up
Source: HighWire-hosted journal article supplement (doi:10.1136/bmjopen-2021-054775), 2022-01-01
Supplement: bmjopen-2021-054775supp003_data_supplement.pdf [file bmjopen-2021-054775supp003_data_supplement.pdf]

## InterAKTIV: Examples of intervention components

### 1. Examples of recurring elements

**Example 1: At the beginning of each module participants see an overview of their progress.**

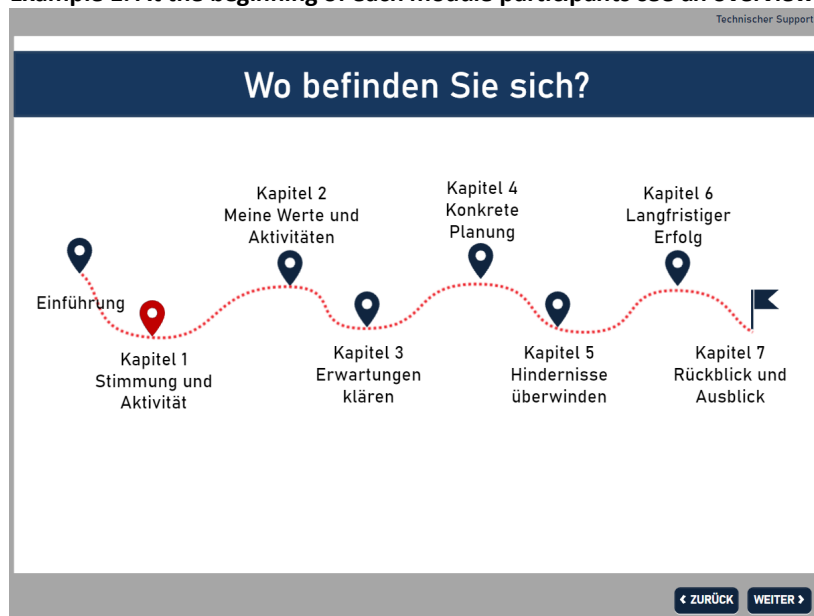

*(InterAKTIV, Module 1, "Where are you currently at?")*

**Example 2: The content of the current module is displayed in each module.**

Technischer Support

### Inhalt des heutigen Kapitels

Heute geht es darum...

- ...besser zu verstehen, warum es trotz guter Vorsätze manchmal nicht gelingt, Aktivitäten auch wirklich auszuführen.
- ...einen Plan zur Durchführung Ihrer ersten Aktivität zu erstellen.
- ...mithilfe des erstellten Plans Ihre erste Aktivität erfolgreich im Alltag durchzuführen.

← ZURÜCK WEITER →

*(InterAKTIV, Module 4, "Content of today's module")*

**Example 3: Towards the end of each module participants can download the homework assignments:**

Technischer Support

➤ **Wochenübung: Stimmungsbeobachtung**

Als Übung zu Kapitel 1 möchten wir Sie dazu anregen, eine Stimmungsbeobachtung durchzuführen. Dabei hilft Ihnen das untenstehende Arbeitsblatt.

Ziel der Übung ist es, dass Sie in Ihrem Alltag noch einmal in Ruhe beobachten, wie Ihre Aktivitäten und Ihre Stimmung zusammenhängen. Klicken Sie auf den Briefbogen, um die Übung zum Ausdrucken herunterzuladen. Für technische Hinweise klicken Sie auf das "i".

 

← ZURÜCK WEITER →

(InterAKTIV, Module 1, "Weekly homework: mood tracking")

## 2. Examples of module-specific components

**Example 1: Module 1 → Psychoeducation on the relationship between activity and mood**

Technischer Support

➤ **Eigener Negativ-Kreislauf**

Woher kennen Sie diesen Kreislauf? Bitte beschreiben Sie eine Situation, in der Ihnen dieser Kreislauf aufgefallen ist.

Für Beispiele fahren Sie mit dem Mauszeiger über die Bilder von Annette und Martin.



 Notieren Sie hier Ihr Beispiel...

  


← ZURÜCK WEITER →

(InterAKTIV, Module 1, "My own negative cycle")

With the help of the two model subjects, study participants can see examples of how to work through the training.

Technischer Support

### ➤ Eigener Negativ-Kreislauf

Woher kennen Sie diesen Kreislauf? Bitte beschreiben Sie eine Situation, in der Ihnen dieser Kreislauf aufgefallen ist.  
Für Beispiele fahren Sie mit dem Mauszeiger über die Bilder von Annette und Martin.



Seit es mir schlechter geht, merke ich, dass ich vor allem am Wochenende ganz energielos bin. Früher habe ich viel unternommen, aber jetzt kann ich mich zu fast nichts mehr aufraffen.

Letztes Wochenende war es so schlimm, dass ich Samstag und Sonntag nur im Bett verbracht habe. Je länger ich dort so lag, desto schlechter war ich drauf. Es war, als würden meine Gedanken immer trüber werden und mein Körper immer müder.

← ZURÜCK WEITER →

(InterAKTIV, Module 1, "My own negative cycle", Exemplary participant)

Example 2: Module 2 → Participants explore and choose relevant areas in their life on which they want to base their subsequent activities.

Technischer Support

### ➤ Lebensbereiche

Während der Gedankenreise haben Sie vielleicht schon eine Idee bekommen, was Ihnen wichtig ist im Leben. Die folgende Übung soll Ihnen dabei helfen, Ihre persönlichen Werte zu identifizieren.

Auf der rechten Seite sehen Sie verschiedene Lebensbereiche. Bitte wählen Sie drei Lebensbereiche aus, die Ihnen besonders wichtig sind und mit denen Sie in den kommenden Wochen arbeiten möchten.

Nehmen Sie sich für die Auswahl ruhig einen Moment Zeit und prüfen Sie, was Ihnen am wichtigsten ist.

Auswahl zurücksetzen

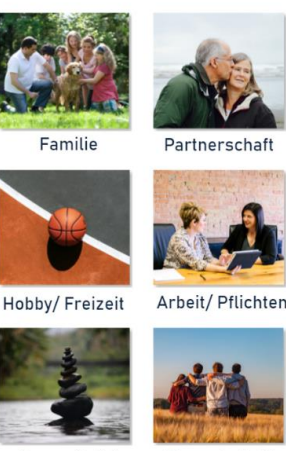

← ZURÜCK WEITER →

(InterAKTIV, Module 2, "Areas of life")

**Example 3: Module 4 → Action planning of a specific activity**

Technischer Support

➤ Wann? Wo? Mit wem? Was sonst?

|            |                                              |   |                                                                                                                                                                      |
|------------|----------------------------------------------|---|----------------------------------------------------------------------------------------------------------------------------------------------------------------------|
| Wann?      | Wann möchten Sie die Aktivität ausführen?    | i | Bitte füllen Sie nun die links angezeigten Fragen zu Ihrer Aktivität aus.                                                                                            |
| Wo?        | Wo möchten Sie die Aktivität ausführen?      | i | Über die Info-Felder bekommen Sie weitere Hinweise.                                                                                                                  |
| Mit wem?   | Mit wem möchten Sie die Aktivität ausführen? | i | Fahren Sie außerdem mit der Maus über die Bilder von Annette und Martin, um ihre Antworten zu sehen.                                                                 |
| Was sonst? | Was sonst muss bedacht werden?               | i |   |

← ZURÜCK WEITER →

(InterAKTIV, Module 4, "When? Where? With whom? What else?")
